# Supplementary material for: Change of Brain Functional Connectivity in Patients With Spinal Cord Injury: Graph Theory Based Approach
Source: PubMed Central journal article supplement — Ann Rehabil Med. 2015 Jun 30;39(3):374–83. doi: 10.5535/arm.2015.39.3.374 (PMC4496508; doi:10.5535/arm.2015.39.3.374), 2015-06-30
Supplement: arm-39-374-s001.pdf [file arm-39-374-s001.pdf]

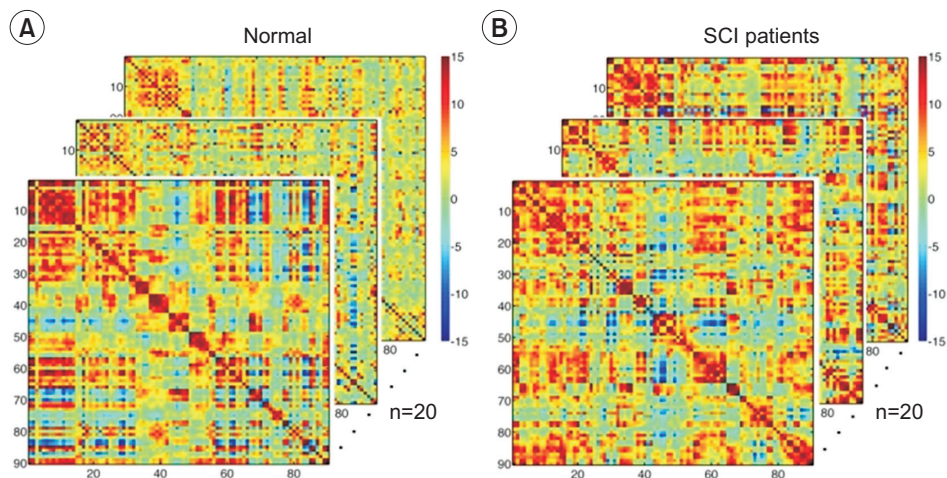

**Supplementary Fig. 1.** Correlation matrix in both of the control (A) and spinal cord injury (SCI) patients (B). The x-axis and y-axis means specific region of interests according to an automated anatomical labeling template. The sequential order of each axis is represented in Supplementary Table 1. The color bar means z-score. The positive functional connectivity between two regions is represented in red and the negative functional connectivity is represented in blue.
