# Supplementary material for: Change of Brain Functional Connectivity in Patients With Spinal Cord Injury: Graph Theory Based Approach
Source: PubMed Central journal article supplement — Ann Rehabil Med. 2015 Jun 30;39(3):374–83. doi: 10.5535/arm.2015.39.3.374 (PMC4496508; doi:10.5535/arm.2015.39.3.374), 2015-06-30
Supplement: arm-39-374-s002.pdf [file arm-39-374-s002.pdf]

**Supplementary Table 1.** List of the automated anatomical labeling template in each hemisphere

| Sequential order | Anatomical description | Sequential order | Anatomical description |
|------------------|------------------------|------------------|------------------------|
| 1                | Precentral_L           | 30               | Insula_R               |
| 2                | Precentral_R           | 31               | Cingulum_Ant_L         |
| 3                | Frontal_Sup_L          | 32               | Cingulum_Ant_R         |
| 4                | Frontal_Sup_R          | 33               | Cingulum_Mid_L         |
| 5                | Frontal_Sup_Orb_L      | 34               | Cingulum_Mid_R         |
| 6                | Frontal_Sup_Orb_R      | 35               | Cingulum_Post_L        |
| 7                | Frontal_Mid_L          | 36               | Cingulum_Post_R        |
| 8                | Frontal_Mid_R          | 37               | Hippocampus_L          |
| 9                | Frontal_Mid_Orb_L      | 38               | Hippocampus_R          |
| 10               | Frontal_Mid_Orb_R      | 39               | ParaHippocampal_L      |
| 11               | Frontal_Inf_Oper_L     | 40               | ParaHippocampal_R      |
| 12               | Frontal_Inf_Oper_R     | 41               | Amygdala_L             |
| 13               | Frontal_Inf_Tri_L      | 42               | Amygdala_R             |
| 14               | Frontal_Inf_Tri_R      | 43               | Calcarine_L            |
| 15               | Frontal_Inf_Orb_L      | 44               | Calcarine_R            |
| 16               | Frontal_Inf_Orb_R      | 45               | Cuneus_L               |
| 17               | Rolandic_Oper_L        | 46               | Cuneus_R               |
| 18               | Rolandic_Oper_R        | 47               | Lingual_L              |
| 19               | Supp_Motor_Area_L      | 48               | Lingual_R              |
| 20               | Supp_Motor_Area_R      | 49               | Occipital_Sup_L        |
| 21               | Olfactory_L            | 50               | Occipital_Sup_R        |
| 22               | Olfactory_R            | 51               | Occipital_Mid_L        |
| 23               | Frontal_Sup_Medial_L   | 52               | Occipital_Mid_R        |
| 24               | Frontal_Sup_Medial_R   | 53               | Occipital_Inf_L        |
| 25               | Frontal_Med_Orb_L      | 54               | Occipital_Inf_R        |
| 26               | Frontal_Med_Orb_R      | 55               | Fusiform_L             |
| 27               | Rectus_L               | 56               | Fusiform_R             |
| 28               | Rectus_R               | 57               | Postcentral_L          |
| 29               | Insula_L               | 58               | Postcentral_R          |
| 59               | Parietal_Sup_L         | 75               | Pallidum_L             |
| 60               | Parietal_Sup_R         | 76               | Pallidum_R             |
| 61               | Parietal_Inf_L         | 77               | Thalamus_L             |
| 62               | Parietal_Inf_R         | 78               | Thalamus_R             |
| 63               | SupraMarginal_L        | 79               | Heschl_L               |
| 64               | SupraMarginal_R        | 80               | Heschl_R               |
| 65               | Angular_L              | 81               | Temporal_Sup_L         |
| 66               | Angular_R              | 82               | Temporal_Sup_R         |
| 67               | Precuneus_L            | 83               | Temporal_Pole_Sup_L    |
| 68               | Precuneus_R            | 84               | Temporal_Pole_Sup_R    |
| 69               | Paracentral_Lobule_L   | 85               | Temporal_Mid_L         |
| 70               | Paracentral_Lobule_R   | 86               | Temporal_Mid_R         |
| 71               | Caudate_L              | 87               | Temporal_Pole_Mid_L    |
| 72               | Caudate_R              | 88               | Temporal_Pole_Mid_R    |
| 73               | Putamen_L              | 89               | Temporal_Inf_L         |
| 74               | Putamen_R              | 90               | Temporal_Inf_R         |

L, left; R, right.
